# Supplementary material for: Comparison of Hemodynamic Parameters Based on the Administration of Remimazolam or Sevoflurane in Patients under General Anesthesia in the Beach Chair Position: A Single-Blinded Randomized Controlled Trial
Source: MDPI journal article supplement (doi:10.3390/jcm13082364), 2024-04-18
Supplement: s1 [file s1]

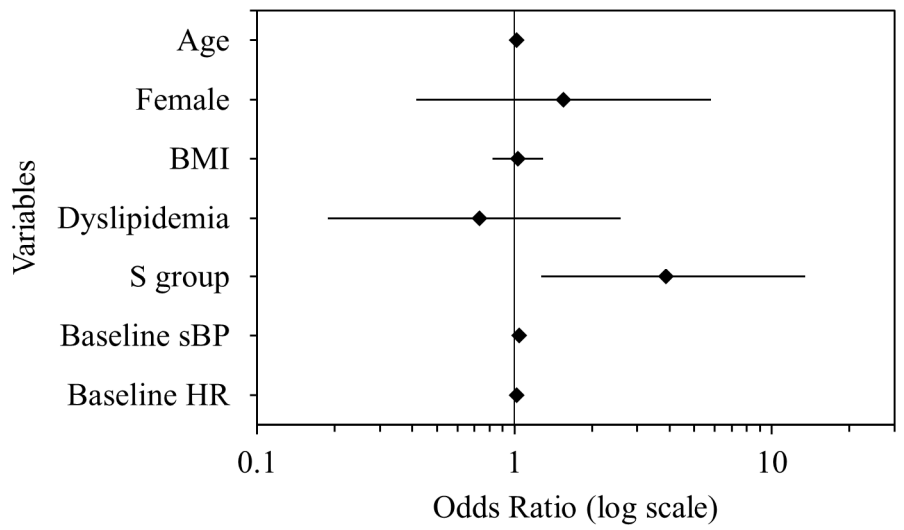

**Figure S1.** Forest plot of the odds ratios for occurrence of hypotension after switching to the beach chair position.

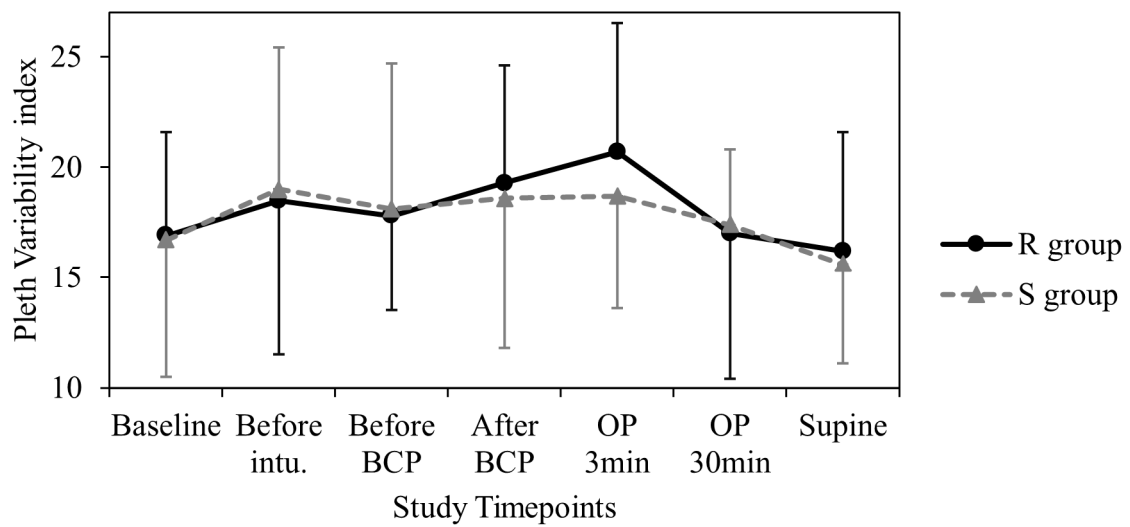

**Figure S2.** Trend in Pleth variability index at different study timepoints.

**Table S1.** Perioperative blood pressure, heart rate, and pleth variability index.

|                                | R group (n = 39) | S group (n = 39) | p-Value |
|--------------------------------|------------------|------------------|---------|
| Systolic blood pressure (mmHg) |                  |                  |         |
| Baseline                       | 134 ± 20         | 132 ± 17         | 0.599   |
| Before tracheal intubation     | 141 ± 17         | 125 ± 21         | <0.001* |
| Before the BCP                 | 157 ± 27         | 136 ± 28         | 0.001*  |
| After switching to the BCP     | 133 ± 25         | 117 ± 20         | 0.002*  |

|                                 |            |            |         |
|---------------------------------|------------|------------|---------|
| Surgical incision               | 132 ± 20   | 126 ± 24   | 0.195   |
| 30 min after incision           | 127 ± 18   | 114 ± 13   | <0.001* |
| After supine                    | 134 ± 21   | 126 ± 25   | 0.127   |
| Post-anesthetic care unit       | 152 ± 18   | 152 ± 21   | 0.935   |
| Mean blood pressure (mmHg)      |            |            |         |
| Baseline                        | 100 ± 14   | 99 ± 12    | 0.739   |
| Before tracheal intubation      | 104 ± 12   | 94 ± 16    | 0.002*  |
| Before the BCP                  | 114 ± 21   | 101 ± 17   | 0.004*  |
| After switching to the BCP      | 100 ± 18   | 90 ± 15    | 0.007*  |
| Surgical incision               | 101 ± 16   | 99 ± 21    | 0.579   |
| 30 min after incision           | 95 ± 14    | 87 ± 11    | 0.009*  |
| After supine                    | 98 ± 18    | 91 ± 21    | 0.090   |
| Post-anesthetic care unit       | 108 ± 18   | 106 ± 16   | 0.589   |
| Diastolic blood pressure (mmHg) |            |            |         |
| Baseline                        | 83 ± 15    | 83 ± 11    | 0.870   |
| Before tracheal intubation      | 83 ± 11    | 74 ± 15    | 0.005*  |
| Before the BCP                  | 89 ± 20    | 78 ± 17    | 0.009*  |
| After switching to the BCP      | 82 ± 16    | 72 ± 14    | 0.003*  |
| Surgical incision               | 84 ± 15    | 81 ± 21    | 0.484   |
| 30 min after incision           | 75 ± 13    | 70 ± 12    | 0.084   |
| After supine                    | 75 ± 14    | 69 ± 20    | 0.138   |
| Post-anesthetic care unit       | 85 ± 16    | 83 ± 16    | 0.559   |
| Heart rate (/min)               |            |            |         |
| Baseline                        | 73 ± 13    | 73 ± 14    | 0.953   |
| Before tracheal intubation      | 83 ± 14    | 78 ± 14    | 0.115   |
| Before the BCP                  | 92 ± 13    | 89 ± 15    | 0.299   |
| After switching to the BCP      | 90 ± 12    | 88 ± 13    | 0.549   |
| Surgical incision               | 85 ± 12    | 80 ± 13    | 0.101   |
| 30 min after incision           | 83 ± 11    | 76 ± 11    | 0.005*  |
| After supine                    | 91 ± 14    | 82 ± 13    | 0.008*  |
| Post-anesthetic care unit       | 79 ± 15    | 74 ± 14    | 0.091   |
| Pleth variability index         |            |            |         |
| Baseline                        | 16.9 ± 4.7 | 16.7 ± 6.2 | 0.869   |
| Before tracheal intubation      | 18.5 ± 7.0 | 19.0 ± 6.4 | 0.776   |
| Before the BCP                  | 17.8 ± 4.3 | 18.1 ± 6.6 | 0.872   |
| After switching to the BCP      | 19.3 ± 5.3 | 18.6 ± 6.8 | 0.618   |

|                       |            |            |       |
|-----------------------|------------|------------|-------|
| Surgical incision     | 20.7 ± 5.8 | 18.7 ± 5.1 | 0.110 |
| 30 min after incision | 17.0 ± 6.6 | 17.4 ± 3.4 | 0.698 |
| After supine          | 16.2 ± 5.4 | 15.6 ± 4.5 | 0.637 |

---

Data are presented as means ± standard deviations. \*Statistically significant. BCP, beach chair position; R, remimazolam; S, sevoflurane.
